# Supplementary material
Source: publisher figshare collection journal article supplement (https://gsapubs.figshare.com/ndownloader/files/23299208)
Supplement: Supplementary file 1 [file 23299208]

## What makes a delta wave-dominated?

Jaap H. Nienhuis, Andrew D. Ashton, Liviu Giosan

### Supplemental Methods

Alongshore sediment transport is computed using the CERC or Komar (Komar, 1998) formula, reformulated into deep-water wave properties (Ashton and Murray, 2006) by back-refracting the waves over shore-parallel contours, which yields:

$$Q_s = K_1 \cdot \rho_s \cdot (1 - p) \cdot H_s^{12/5} T^{1/5} \cos^{6/5}(\phi_0 - \theta) \sin(\phi_0 - \theta), \quad (1)$$

in units of  $\text{kg s}^{-1}$ . Where

$$K_1 = 5.3 \cdot 10^{-6} \cdot K \left( \frac{1}{2n} \right)^{6/5} \left( \frac{\sqrt{g} \gamma_b}{2\pi} \right)^{1/5}, \quad (2)$$

is an empirical constant that equals  $\sim 0.06 \text{ m}^{3/5} \text{ s}^{-6/5}$ .  $K = 0.46 \rho g^{3/2}$  (Komar, 1998),  $H_s$  is the offshore deep-water significant wave height (m),  $T$  is the wave period (s),  $\phi_0$  is the deep-water wave approach angle, and  $\theta$  is the local shoreline orientation (Ashton and Murray, 2006) (Fig. 1c). The density of water and sediment are denoted by  $\rho$  and  $\rho_s$  ( $\text{kg m}^{-3}$ ),  $p$  is the dry mass void fraction,  $g$  is the gravitational acceleration ( $\text{ms}^{-2}$ ),  $\gamma_b$  is the ratio of breaking wave height and water depth ( $\gamma_b = 0.78$ ), and  $n$  is the ratio of group velocity to phase velocity of the breaking waves (1 in shallow water). With the angles defined as in figure 1a,  $Q_s$  is positive to the right looking offshore.

As waves approach the shore from different angles over time, they contribute to  $Q_s$  either to the left or the right. Integrated over time, the relative contribution of each wave direction to the

alongshore sediment transport is given by the wave energy probability density distribution (Fig. 1b),

$$E(\phi_0) = \frac{H_s^{12/5}(\phi_0) \cdot T^{1/5}(\phi_0)}{\sum_{\phi_0} H_s^{12/5}(\phi_0) \cdot T^{1/5}(\phi_0)}. \quad (3)$$

The net alongshore sediment transport for a shoreline orientation  $\theta$  is therefore given by the convolution integral of the wave energy probability distribution  $E$  and the alongshore sediment transport function  $Q_s$ ,

$$Q_{s,net}(\theta) = E(\phi_0) * Q_s(\phi_0 - \theta), \quad (4)$$

with  $Q_s$  as defined in equation (1) (Fig. 1d). The deep-water significant wave height is

$$H_{s,net} = \left( \frac{1}{N} \sum_N H_s^{12/5} \right)^{5/12} \text{ and the wave period is } T_{net} = \left( \frac{1}{N} \sum_N T^{1/5} \right)^5.$$

The maximum alongshore littoral transport away from the river mouth  $Q_{s,max}(\theta)$  is the sum of the maximum fluxes to the left and right delta flank,

$$Q_{s,max} = Q_{s,max,r} - Q_{s,max,l}, \quad (5)$$

$$Q_{s,max} = \max_{-\pi \leq \theta \leq 0} [E(\phi_0) * Q_{s,r}(\phi_0 - \theta)] - \min_{0 \leq \theta \leq \pi} [E(\phi_0) * Q_{s,l}(\phi_0 - \theta)]. \quad (6)$$

Note that the minus sign and the minimum function arise from the definition of  $Q_s$ , being positive to the right looking offshore.

For the drainage basins in Java, we compute sediment discharge using the BQART formula (Syvitski and Milliman, 2007), which estimates fluvial sediment flux based upon drainage area, basin climate, and relief,

$$Q_r = \omega B Q^{0.31} A^{0.5} R T, \quad (7)$$

where  $\omega=0.02$  is a fitting parameter,  $B = IL (1-T_E)E_h$  accounts for geologic and land use factors,  $Q$  is the fluvial water discharge ( $\text{m}^3\text{s}^{-1}$ ),  $A$  is the drainage basin area ( $\text{km}^2$ ),  $R$  is the relief (elevation maximum, km) and  $T$  is the basin average temperature ( $^{\circ}\text{C}$ ). For  $B$ ,  $I$  is a glacial erosion factor (1 in this case) and  $L$  captures the soil erodibility.  $T_E$  and  $E_h$  account respectively for the anthropogenic trapping of sediment and increase in soil erosion, which we assume to cancel out (Syvitski and Milliman, 2007). Drainage basin areas and relief are retrieved from the USGS HydroSHEDS database (Lehner et al., 2008). Supplementary Tables 1 and 2 list the values used in this study. Based on estimates on the sand fraction in the Porong river in East-Java (Hoekstra, 1989), we assume that 10% (the sand or littoral grade fraction) of the total fluvial sediment flux ( $Q_{r,total}$ ) directly amalgamates to the shoreline.

We measure shoreline orientation  $\theta$  close to the river mouth of the left and right flanks of every delta, and the orientation of the non-deltaic coastline. As the Java deltas are generally symmetrical or close to it, we use an average of the two shoreline angles as a representative transport angle. To estimate wave climatology, we use the NOAA WaveWatch III hindcast reanalysis data of 1997 to 2010 (Chawla et al., 2011).

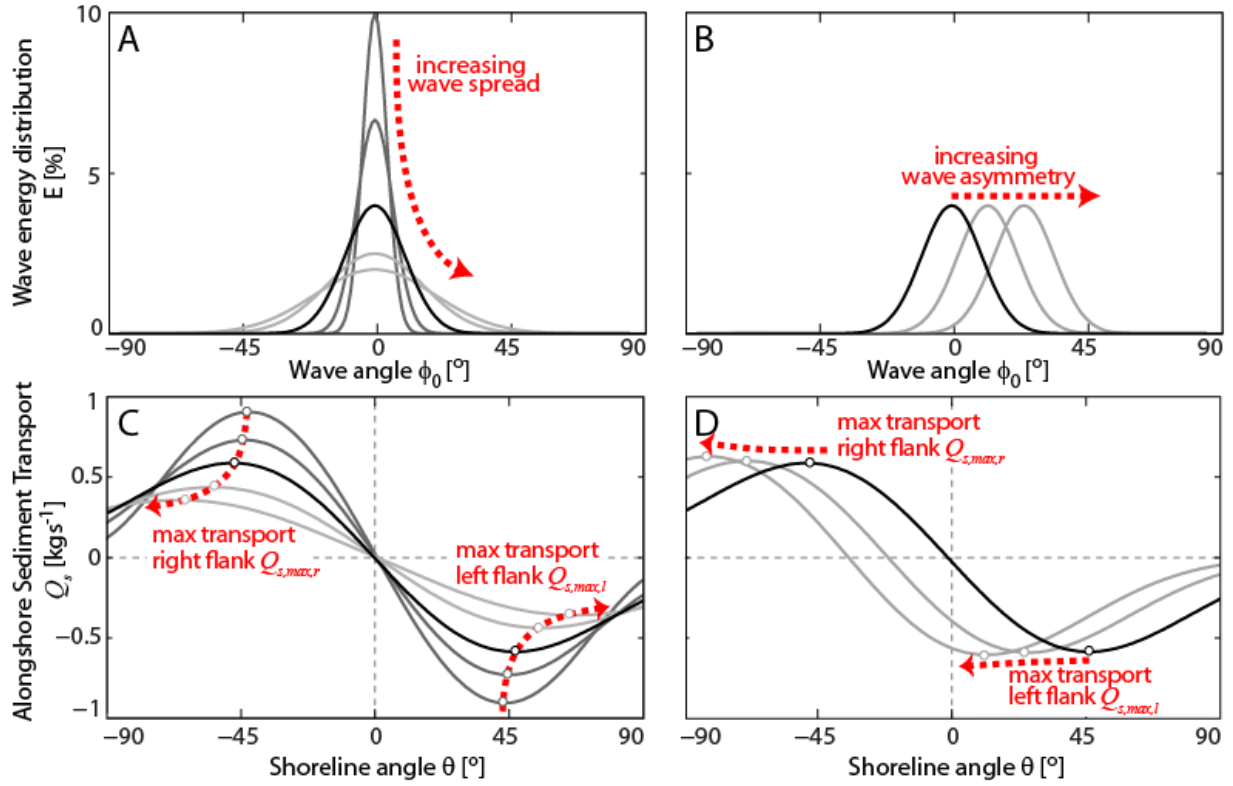

**Supplementary Figure 1.** Effect of wave climate distribution on  $\theta_{max}$  and  $Q_{s,max}$ . Hypothetical wave distributions with varying (A) wave angle spread and (B) mean approach angle with (C, D) corresponding littoral transport as a function of shoreline orientation for the wave climates in the upper panels, normalized to  $Q_s$  at zero standard deviation. Red dotted lines track the location of the maxima for changes in the wave distribution.

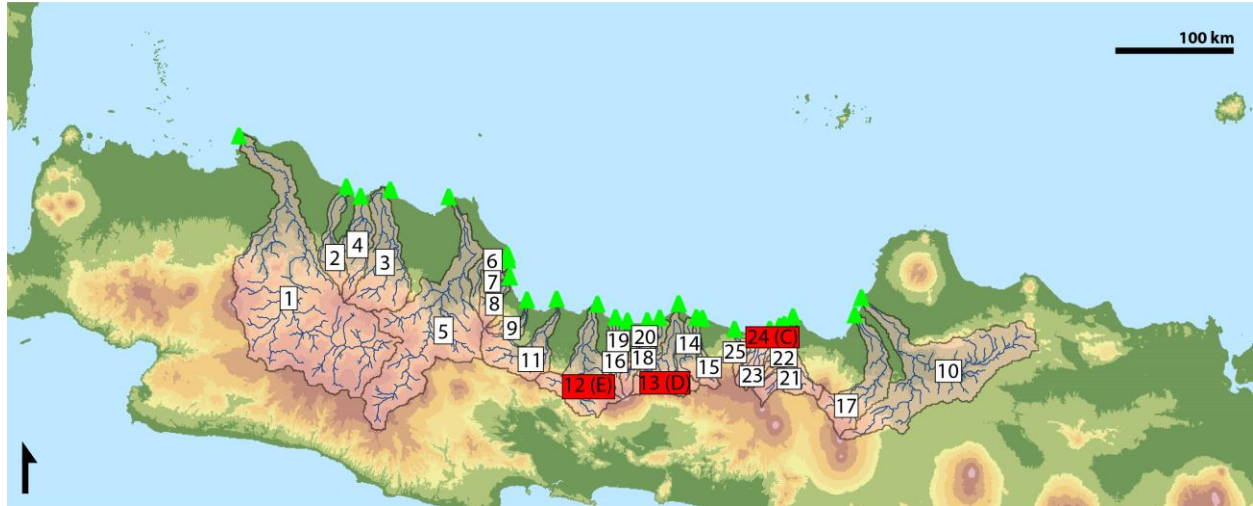

**Supplementary Figure 2.** Drainage basins of 25 deltas and the subaerial elevation from SRTM data (Farr and Kobrick, 2000). Red markers correspond to the examples displayed in Figure 2. See Supplementary Table 1.

**Supplementary Table 1:** Morphologic and drainage basin properties of deltas along the Java, Indonesia, coastline. The index # corresponds to the numbers in Supplementary Figure 2. The names of rivers 2, 9, 11, 19 and 22 are unknown to the authors. (\*) indicates that the deltaic shoreline is visually river-dominated and therefore the shoreline orientation is unmeasurable.

| #  | River          | Lat    | Lon     | Drainage Area $A$ [km <sup>2</sup> ] | Relief $R$ [km] | Water Flux $Q$ [km <sup>3</sup> yr <sup>-1</sup> ] | Sediment Flux $Q_{r,total}$ [kgs <sup>-1</sup> ] | Shoreline angle [°] | Left flank angle, $\theta_l$ [°] | Right flank angle, $\theta_r$ [°] | Average flank angle $\theta$ [°] | Max Littoral Transport $Q_{s,max}$ [kgs <sup>-1</sup> ] | Fluvial Dominance $R$ |
|----|----------------|--------|---------|--------------------------------------|-----------------|----------------------------------------------------|--------------------------------------------------|---------------------|----------------------------------|-----------------------------------|----------------------------------|---------------------------------------------------------|-----------------------|
| 1  | Citarum/Sungai | -5.939 | 107.010 | 6709                                 | 2.964           | 86                                                 | 1122                                             | 246                 | *                                | *                                 | *                                | 47                                                      | 2.40                  |
| 2  | ?              | -6.194 | 107.623 | 548                                  | 1.764           | 12                                                 | 103                                              | 297                 | 270                              | 143                               | 26.5                             | 22                                                      | 0.47                  |
| 3  | Kali Pontjol   | -6.208 | 107.874 | 1442                                 | 2.036           | 25                                                 | 244                                              | 306                 | *                                | *                                 | *                                | 28                                                      | 0.87                  |
| 4  | Tji Asem       | -6.242 | 107.706 | 730                                  | 2.051           | 15                                                 | 148                                              | 262                 | 229                              | 115                               | 33                               | 23                                                      | 0.64                  |
| 5  | Cimanuk        | -6.242 | 108.207 | 3692                                 | 2.886           | 54                                                 | 699                                              | 240                 | *                                | *                                 | *                                | 16                                                      | 4.33                  |
| 6  | Kali Pondok    | -6.536 | 108.544 | 273                                  | 0.641           | 7                                                  | 22                                               | 347                 | 342                              | 172                               | 5                                | 48                                                      | 0.05                  |
| 7  | Waringin       | -6.561 | 108.545 | 197                                  | 0.385           | 5                                                  | 10                                               | 362                 | 350                              | 193                               | 11.5                             | 52                                                      | 0.02                  |
| 8  | Kali Truivag   | -6.646 | 108.557 | 274                                  | 2.967           | 7                                                  | 103                                              | 355                 | 337                              | 192                               | 17.5                             | 50                                                      | 0.21                  |
| 9  | ?              | -6.759 | 108.656 | 213                                  | 2.866           | 5                                                  | 82                                               | 268                 | 225                              | 131                               | 43                               | 22                                                      | 0.38                  |
| 10 | Serang River   | -6.749 | 110.563 | 3424                                 | 2.806           | 50                                                 | 642                                              | 212                 | *                                | *                                 | *                                | 30                                                      | 2.14                  |
| 11 | ?              | -6.756 | 108.825 | 925                                  | 2.965           | 18                                                 | 255                                              | 278                 | 227                              | 148                               | 50.5                             | 26                                                      | 0.98                  |
| 12 | Sungai pemali  | -6.781 | 109.058 | 1334                                 | 2.569           | 24                                                 | 290                                              | 278                 | *                                | *                                 | *                                | 18                                                      | 1.64                  |
| 13 | Kali Tjomal    | -6.780 | 109.521 | 817                                  | 2.803           | 16                                                 | 220                                              | 276                 | 227                              | 145                               | 49                               | 26                                                      | 0.83                  |
| 14 | Kali Sragi     | -6.848 | 109.622 | 322                                  | 1.185           | 8                                                  | 46                                               | 282                 | 271                              | 112                               | 10.5                             | 26                                                      | 0.18                  |
| 15 | Kali Baro      | -6.853 | 109.657 | 265                                  | 1.907           | 7                                                  | 64                                               | 285                 | 272                              | 117                               | 12.5                             | 26                                                      | 0.25                  |
| 16 | Danawari       | -6.848 | 109.160 | 226                                  | 3.319           | 6                                                  | 99                                               | 282                 | 262                              | 122                               | 20                               | 27                                                      | 0.37                  |
| 17 | Kali Tuntang   | -6.836 | 110.527 | 1171                                 | 3.004           | 21                                                 | 308                                              | 200                 | 144                              | 76                                | 56                               | 47                                                      | 0.65                  |
| 18 | Kali Labon     | -6.852 | 109.415 | 291                                  | 3.376           | 7                                                  | 122                                              | 250                 | 249                              | 71                                | 1                                | 26                                                      | 0.47                  |
| 19 | ?              | -6.866 | 109.230 | 155                                  | 0.586           | 4                                                  | 13                                               | 275                 | 262                              | 108                               | 13                               | 27                                                      | 0.05                  |
| 20 | Kali Brungut   | -6.864 | 109.342 | 229                                  | 0.726           | 6                                                  | 22                                               | 261                 | 251                              | 91                                | 10                               | 27                                                      | 0.08                  |
| 21 | Bodri          | -6.844 | 110.174 | 626                                  | 2.512           | 13                                                 | 161                                              | 268                 | 225                              | 130                               | 42.5                             | 50                                                      | 0.32                  |
| 22 | ?              | -6.882 | 110.124 | 153                                  | 1.358           | 4                                                  | 30                                               | 246                 | 244                              | 67                                | 1.5                              | 49                                                      | 0.06                  |
| 23 | Kali Blukar    | -6.892 | 110.098 | 395                                  | 1.595           | 9                                                  | 72                                               | 253                 | 249                              | 76                                | 3.5                              | 40                                                      | 0.18                  |
| 24 | Kali Satrian   | -6.907 | 110.042 | 106                                  | 2.524           | 3                                                  | 43                                               | 257                 | 244                              | 90                                | 13                               | 26                                                      | 0.16                  |
| 25 | Kali Ambo      | -6.907 | 109.841 | 128                                  | 1.672           | 4                                                  | 33                                               | 280                 | 275                              | 105                               | 5                                | 26                                                      | 0.13                  |

**Supplementary Table 2:** BQART factors and their values and references as used in this study.

| Variable      | Value | Note [units]                                                                                              | Reference                                 |
|---------------|-------|-----------------------------------------------------------------------------------------------------------|-------------------------------------------|
| $Q_{r,total}$ |       | Estimated total fluvial sediment flux: $Q_{r,total} = \omega B Q^{0.31} A^{0.5} R T$ [kgs <sup>-1</sup> ] | (Syvitski and Milliman, 2007)             |
| $\omega$      | 0.02  | Fitting parameter [kgs <sup>-0.69</sup> km <sup>-2</sup> °C <sup>-1</sup> m <sup>-0.93</sup> ]            | (Syvitski and Milliman, 2007)             |
| $B$           | 2     | Accumulated geologic and land use factors: $B = I L (1 - T_E) E_h$ [-]                                    | (Syvitski and Milliman, 2007)             |
| $Q$           |       | Fluvial water discharge, $Q = 0.075 A^{0.8}$ [m <sup>3</sup> s <sup>-1</sup> ]                            | (Syvitski and Milliman, 2007)             |
| $A$           |       | Drainage basin area, retrieved from USGS HydroSHEDS [km <sup>2</sup> ]                                    | (Lehner et al., 2008)                     |
| $R$           |       | Relief (maximum elevation) retrieved from SRTM 15s DEM data [km]                                          | (Farr and Kobrick, 2000)                  |
| $T$           | 28    | Basin-wide average temperature [°C]                                                                       | (World Meteorological Organization, 2014) |
| $I$           | 1     | Glacial erosion factor [-]                                                                                |                                           |
| $L$           | 2     | Soil erodibility [-]                                                                                      | (Syvitski and Milliman, 2007)             |
| $T_E$         |       | Anthropogenic trapping of sediment, we assume no net anthropogenic effect [-]                             |                                           |
| $E_h$         |       | Anthropogenic increase in soil erosion, we assume no net anthropogenic effect [-]                         |                                           |

**Supplementary Table 3:** Properties and flux estimates for 4 well-documented deltas. (\*) indicates that the deltaic shoreline is river-dominated and therefore the shoreline orientation is unmeasurable. We assume a sand fraction of 10% for the Senegal and the Sao Francisco rivers.

| Delta               | Lat    | Lon    | Fluvial sand flux $Q_r$ [kgs <sup>-1</sup> ] | Shoreline Angle [°] | Left Flank Angle, $\theta_l$ [°] | Right Flank Angle, $\theta_r$ [°] | Average flank angle $\theta$ [°] | Max Littoral Transport $Q_{s,max}$ [kgs <sup>-1</sup> ] | Fluvial Dominance $R$ | Ref                                                  |
|---------------------|--------|--------|----------------------------------------------|---------------------|----------------------------------|-----------------------------------|----------------------------------|---------------------------------------------------------|-----------------------|------------------------------------------------------|
| Senegal             | 15.99  | -16.51 | 15                                           | 184                 | 0                                | 3                                 | 2                                | 225                                                     | 0.04                  | (Martins and Probst, 1991; Chawla et al., 2011)      |
| Sao Francisco       | -10.48 | -36.40 | 75                                           | 50                  | 21                               | 22                                | 22                               | 280                                                     | 0.3                   | (Lima et al., 2005; Chawla et al., 2011)             |
| Tinajones, Sinu     | 9.420  | -75.92 | 133                                          | 247                 | *                                | *                                 | *                                | 65                                                      | 2                     | (Restrepo et al., 2009; Chawla et al., 2011)         |
| Belize, Mississippi | 29.20  | -89.30 | 919                                          | 82                  | *                                | *                                 | *                                | 130                                                     | 7                     | (Chawla et al., 2011; Nittrouer and Viparelli, 2014) |



## References

- Ashton, A.D., and Murray, A.B., 2006, High-angle wave instability and emergent shoreline shapes: 1. Modeling of sand waves, flying spits, and capes: *Journal of Geophysical Research*, v. 111, no. F4, p. F04011, doi: 10.1029/2005JF000422.
- Chawla, A., Spindler, D., and Tolman, H.L., 2011, A Thirty Year Wave Hindcast Using The Latest NCEP Climate Forecast System Reanalysis Winds, *in* Proceedings of the 12th International Workshop on Wave Hindcasting and Forecasting, Kohala Coast, Hawaii.
- Farr, T.G., and Kobrick, M., 2000, Shuttle radar topography mission produces a wealth of data: *Eos, Transactions American Geophysical Union*, v. 81, no. 48, p. 583, doi: 10.1029/EO081i048p00583.
- Hoekstra, P., 1989, Hydrodynamics and depositional processes of the Solo and Porong Deltas, East Java, Indonesia, *in* Linden, W.J.M. van der, Cloetingh, S.A.P.L., Kaasschieter, J.P., Graaff, W.J. van de, Vandenberghe, J., and Gun, J.A.M. van der eds., Proceedings KNGMG Symposium "Coastal Lowlands, Geology and Geotechnology," Springer Science+Business Media, Dordrecht, p. 161–173.
- Komar, P.D., 1998, Beach processes and sedimentation: Prentice Hall, Upper Saddle River, NJ. 544 p.
- Lehner, B., Verdin, K., and Jarvis, A., 2008, New Global Hydrography Derived From Spaceborne Elevation Data: *Eos, Transactions American Geophysical Union*, v. 89, no. 10, p. 93, doi: 10.1029/2008EO100001.
- Lima, J.E.F.W., Lopes, W.T.A., De Oliveira Carvalho, N., Vieira, M.R., and Da Silva, E.M., 2005, Suspended sediment fluxes in the large river basins of Brazil, *in* Walling, D.E. and Horowitz, A.J. eds., IAHS ICCE symposium: Sediments Budgets 1, IAHS Publications, p. 355–364.
- Martins, O., and Probst, J.-L., 1991, Biogeochemistry of Major African Rivers: Carbon and Mineral Transport, *in* Degens, E.T., Kempe, S., and Richley, J.E. eds., Biogeochemistry of Major World Rivers, John Wiley & Sons, Ltd., p. 127–155.
- Nittrouer, J.A., and Viparelli, E., 2014, Sand as a stable and sustainable resource for nourishing the Mississippi River delta: *Nature Geoscience*, v. 7, no. 5, p. 350–354, doi: 10.1038/ngeo2142.
- Restrepo, J.D., López, S.A., and Restrepo, J.C., 2009, The effects of geomorphic controls on sediment yield in the Andean rivers of Colombia: *Latin American Journal of Sedimentology and Basin analysis*, v. 16, no. 2, p. 79–92.
- Syvitski, J.P.M., and Milliman, J.D., 2007, Geology, Geography, and Humans Battle for Dominance over the Delivery of Fluvial Sediment to the Coastal Ocean: *The Journal of Geology*, v. 115, no. 1, p. 1–19, doi: 10.1086/509246.
- World Meteorological Organization, 2014, WMO Mean Annual Temperature: World Weather: Jakarta, Indonesia, p. <http://worldweather.wmo.int/en/city.html?cityId=31>.
